# Supplementary material for: Mutations in the tail domain of MYH3 contributes to atrial septal defect
Source: PubMed Central journal article supplement (PMC7173802; doi:10.1371/journal.pone.0230982), 2020-04-21
Supplement: pone.0230982.s003.pdf [file pone.0230982.s003.pdf]

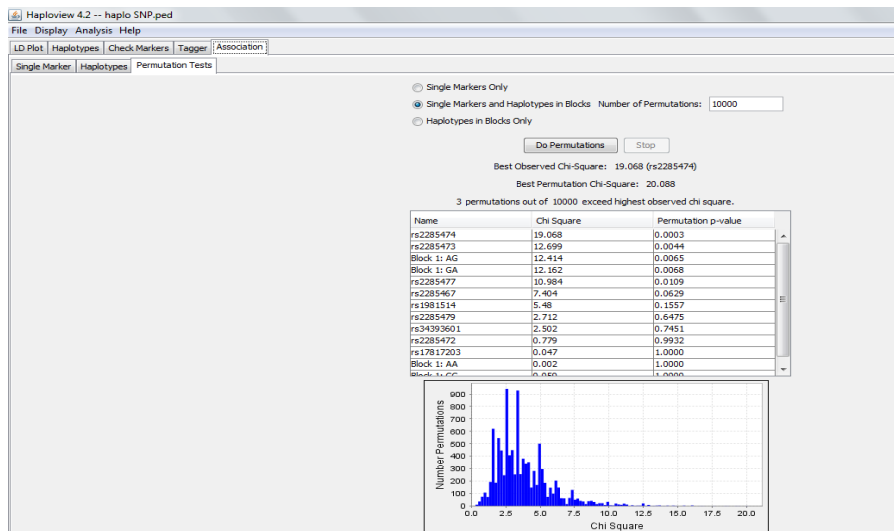

**S3 Fig 3. Permutation based analysis for haplotype block association for rs2285477, rs2285474 and rs2285473.**

The X-axis corresponds to chi-square value of permuted SNPs and the Y-axis corresponds to number of permutation. Permutation progress bar indicates the tallest bar with highest permuted  $\chi^2$  at >900 permutation
